# Supplementary material for: Heteroatom-doped highly porous carbons prepared by in situ activation for efficient adsorptive removal of sulfamethoxazole
Source: Royal Society of Chemistry journal article supplement (doi:10.1039/c9ra09269b), 2020-01-01
Supplement: c9ra09269b1.pdf [file c9ra09269b1.pdf]

Supplementary Materials for:

**Heteroatom-doped highly porous carbons prepared by in-situ activation for  
efficient adsorptive removal of sulfamethoxazole**

Wei Zheng<sup>1a</sup>, Yawei Shi<sup>1a</sup>, Guozhu Liu<sup>b</sup>, Bin Zhao<sup>a</sup> and Liang Wang<sup>\*a</sup>

*<sup>a</sup> State Key Laboratory of Separation Membranes and Membrane Processes, School of  
Environmental Science and Engineering, Tianjin Polytechnic University, Tianjin  
300387, China*

*<sup>b</sup> School of Chemical Engineering and Technology, Tianjin University, Tianjin 300072,  
China.*

\*Corresponding author. Tel. /fax: +86 22 83955392.

E-mail address: mashi7822@163.com (L. Wang).

<sup>1</sup>Wei Zheng and Yawei Shi contributed equally.

## Equations

$$q_e = \frac{(C_0 - C_e)V}{m} \quad (S1)$$

where  $C_0$  and  $C_e$  (mg/L) are the SMX concentrations at initial and equilibrium, respectively.  $m$  (g) is the mass of adsorbent and  $V$  (L) is the solution volume.

$$q_t = \frac{(C_0 - C_t)V}{m} \quad (S2)$$

where  $q_t$  is the adsorption capacity (mg/g),  $C_0$  is the initial concentration of SMX in solution (mg/L),  $C_t$  is the concentration at time  $t$  (mg/L),  $m$  is the mass of the adsorbent (g), and  $V$  is the volume of the solution (L).

$$q_e = q_{\max} \cdot K_L \cdot C_e / (1 + C_e \cdot K_L) \quad (S3)$$

where  $q_{\max}$  is maximum adsorption capacity, and  $K_L$  (L/mg) represents Langmuir constant that relates to the affinity of the binding sites which describes the intensity of the adsorption process.

$$q_e = K_F \cdot C_e^{1/n} \quad (S4)$$

where  $K_F$  and  $n$  are Freundlich constants indicative of adsorption capacity and adsorption intensity, respectively.

$$q_t = q_e(1 - \exp(-k_1 t)) \quad (S5)$$

$$q_t = q_e^2 k_2 t / (1 + q_e k_2 t) \quad (S6)$$

$$h = k_2 \cdot q_e^2 \quad (S7)$$

where  $q_t$  ( $\text{mg} \cdot \text{g}^{-1}$ ) and  $q_e$  ( $\text{mg} \cdot \text{g}^{-1}$ ) are the amount of SMX adsorbed at the contact time of  $t$  (min) and equilibrium, respectively;  $k_1$  ( $\text{min}^{-1}$ ) and  $k_2$  ( $\text{g} (\text{mg}^{-1} \text{min}^{-1})$ ) are the rate constants for the pseudo-first-order and pseudo-second-order models, respectively.

## Reactions

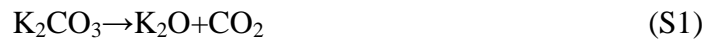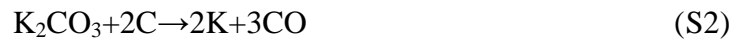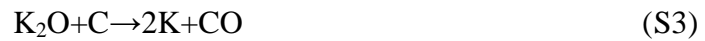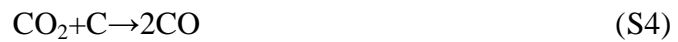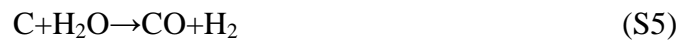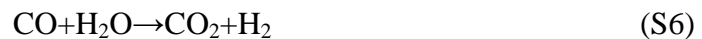

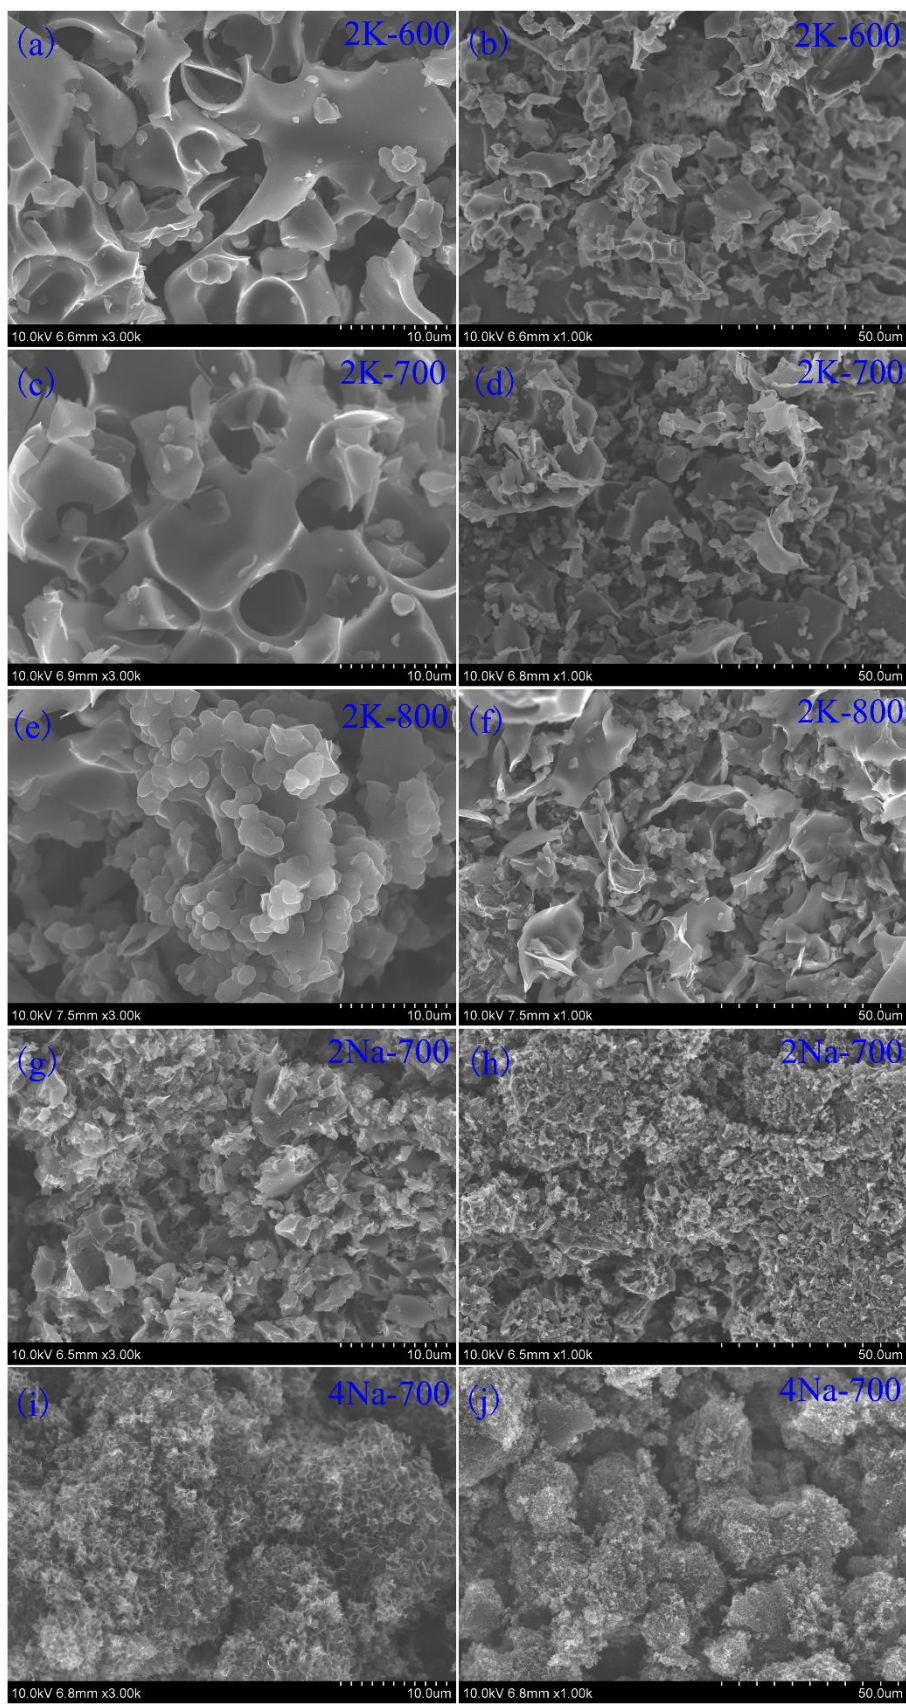

Figure S1. High resolution (a, c, e, g, i) and low resolution (b, d, f, h, j) SEM image of porous carbons.

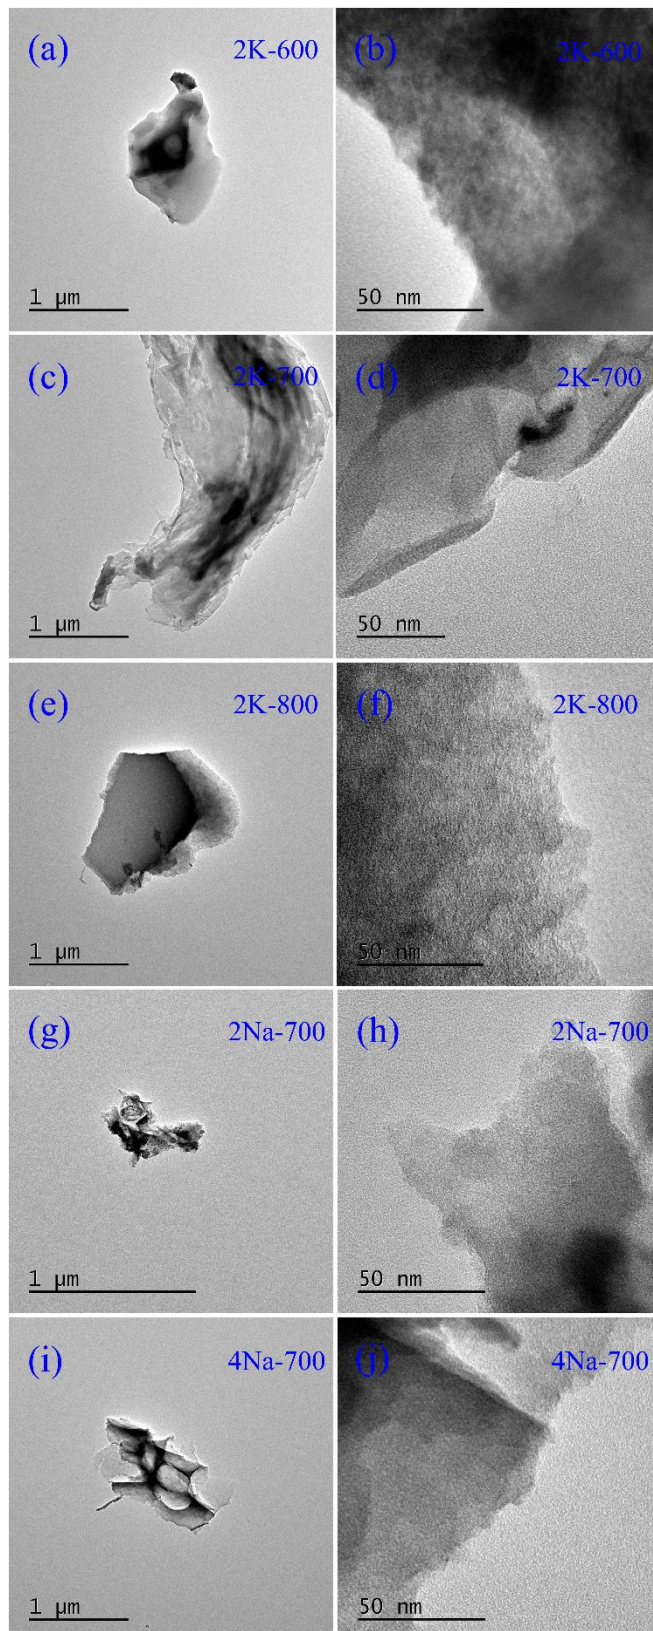

Figure S2. Low resolution (a, c, e, g, i) and high resolution (b, d, f, h, j) TEM image of porous carbons.

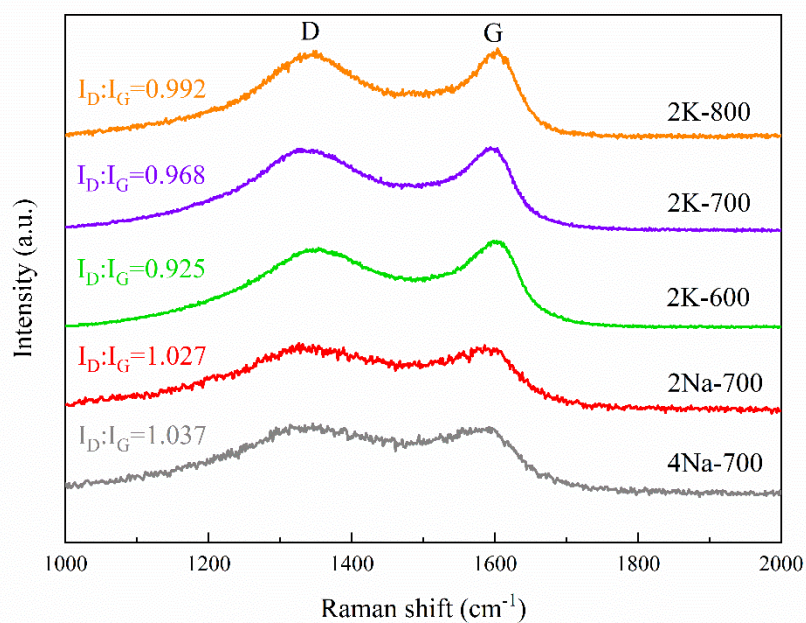

Figure S3. Raman spectra of porous carbons

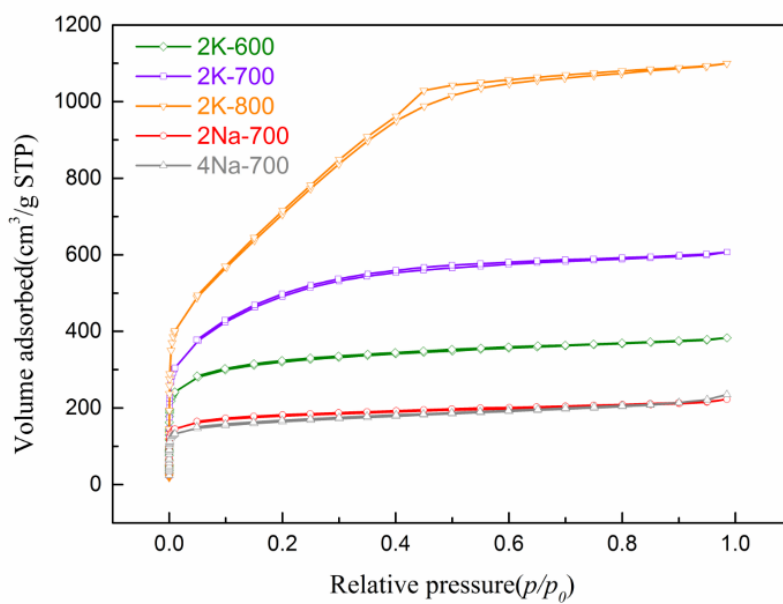

Figure S4. Nitrogen sorption isotherms of the porous carbons.

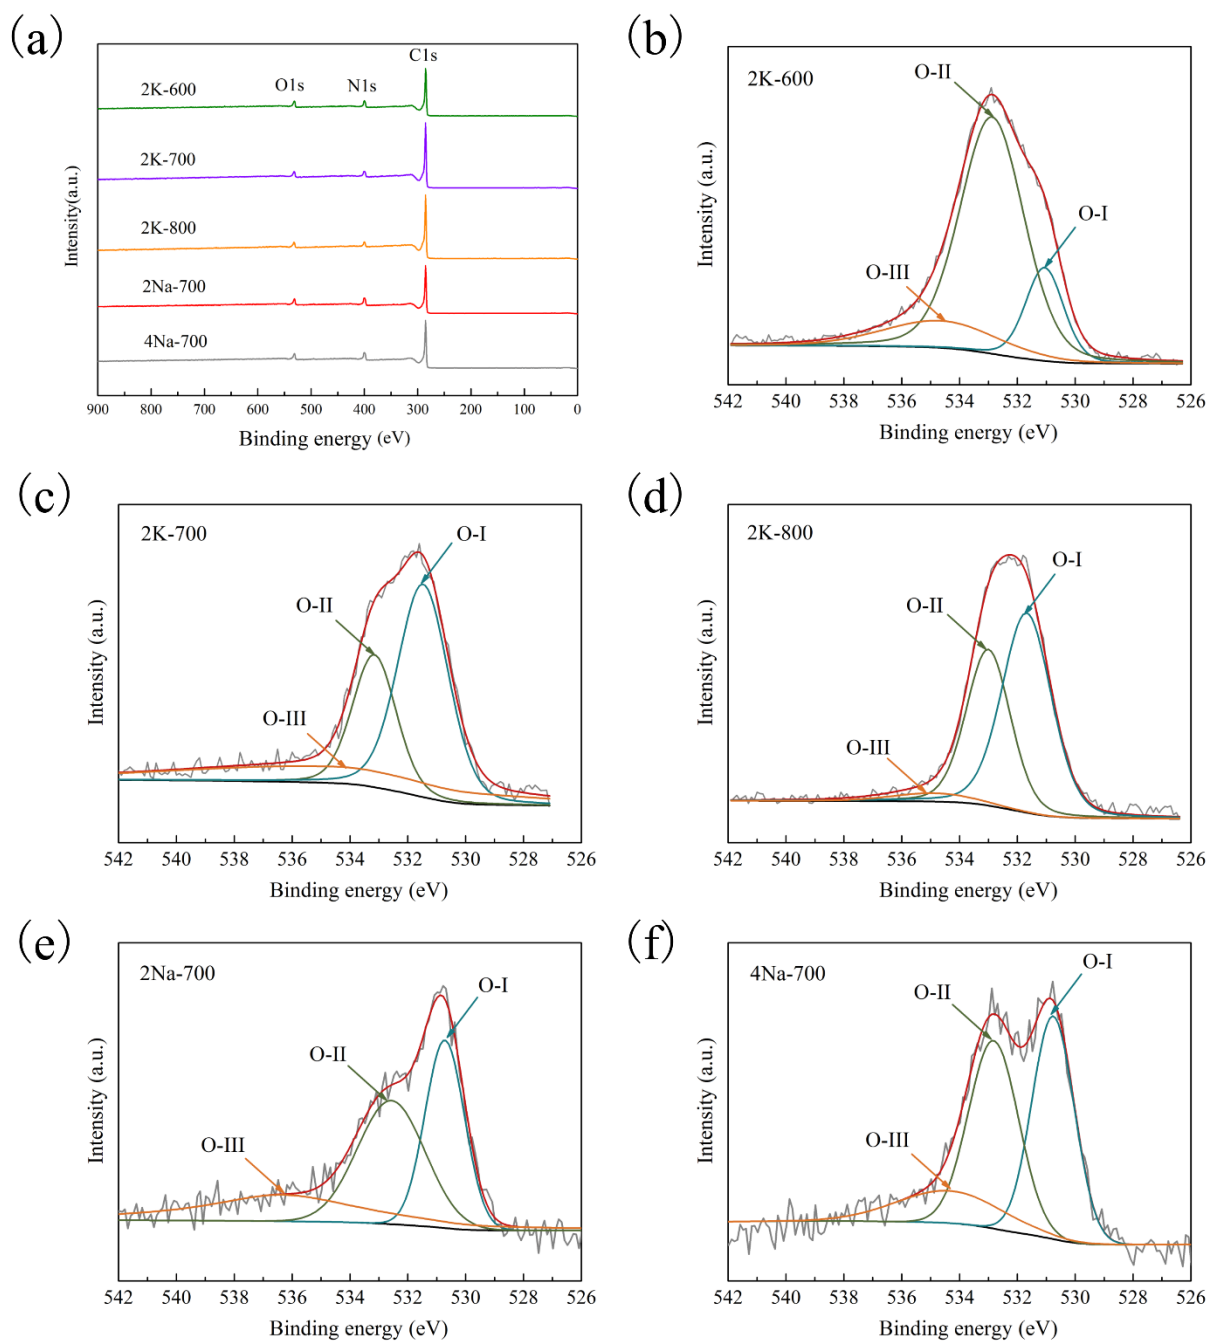

Figure S5 XPS spectra (a) and deconvolution of the high-resolution O1s spectra(b–f) of the porous carbons

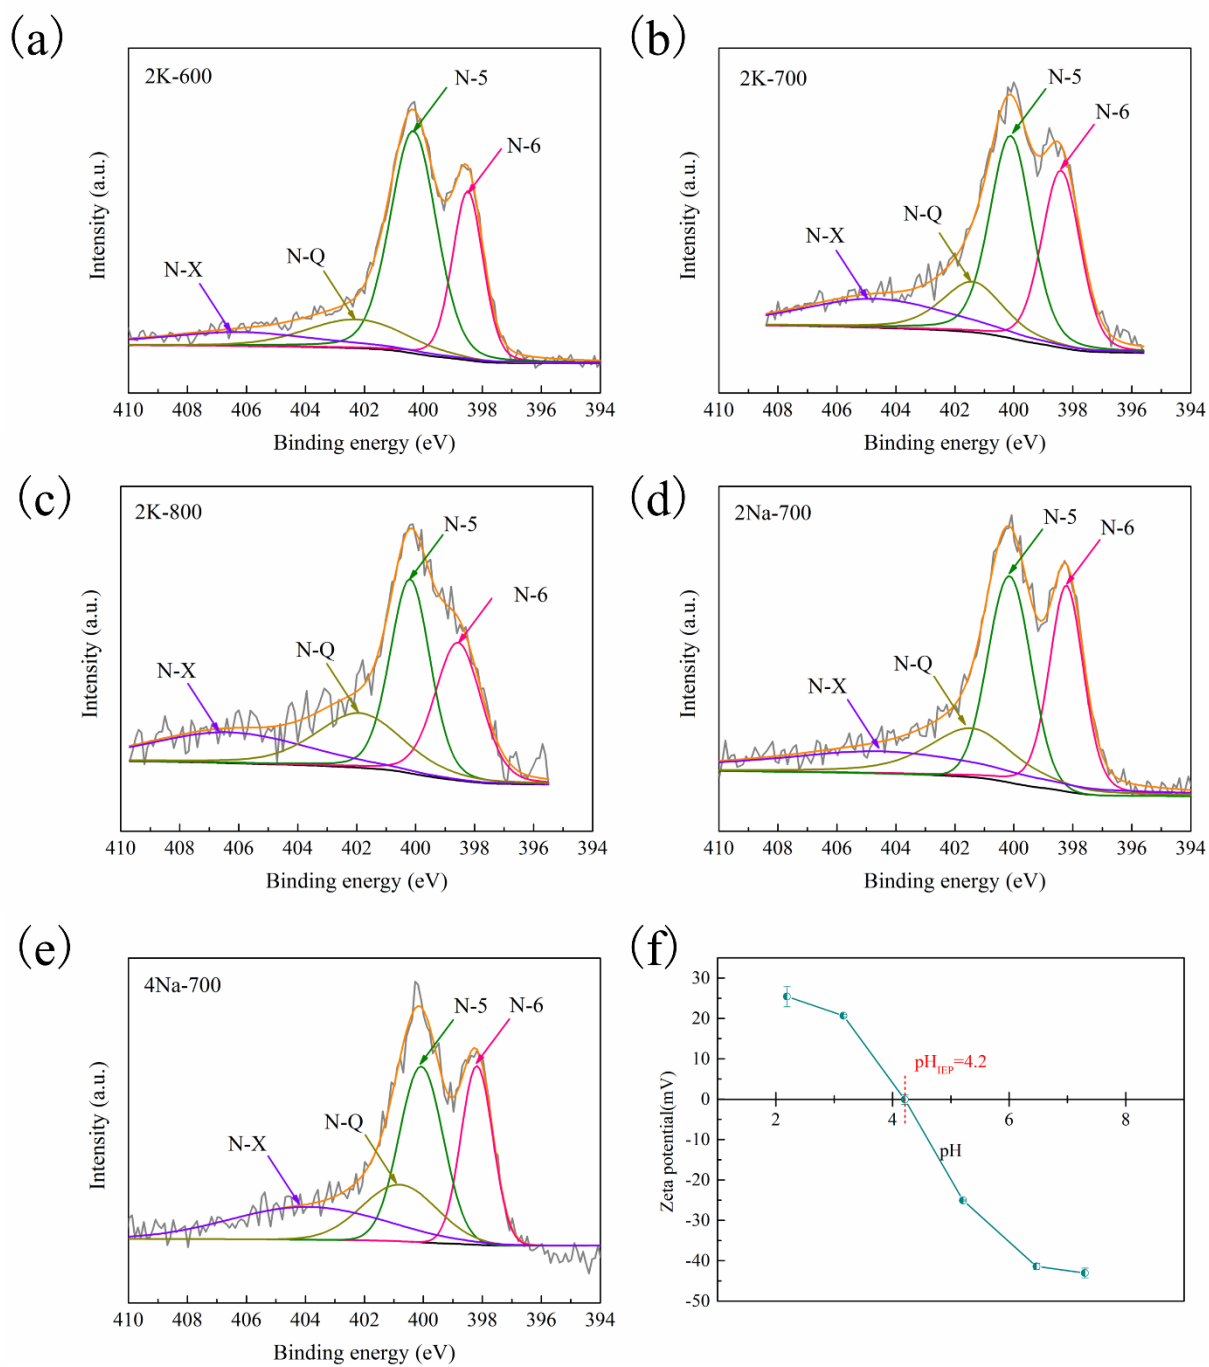

Figure S6 Deconvolution of the high-resolution N1s spectra(a-e) and Effect of pH on zeta-potential of 2K-700 (f)

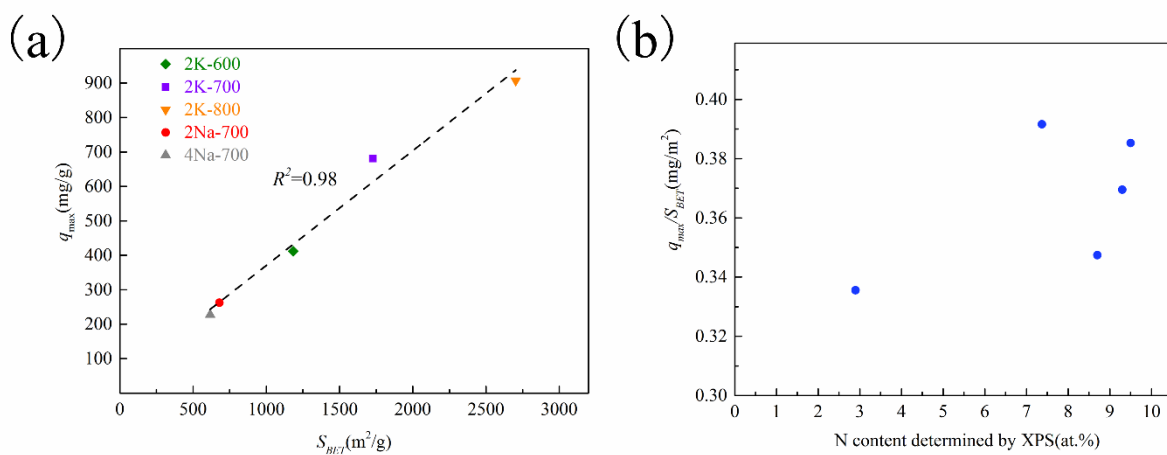

Figure S7 Effects of  $S_{BET}$  on the adsorption of SMX (a) Effect of nitrogen content on relative adsorption amount (b)

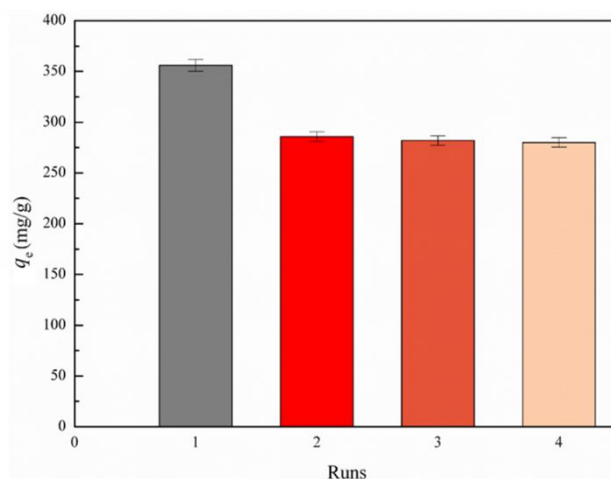

Figure S8 Recyclability of 2K-700 for adsorption of SMX from water.



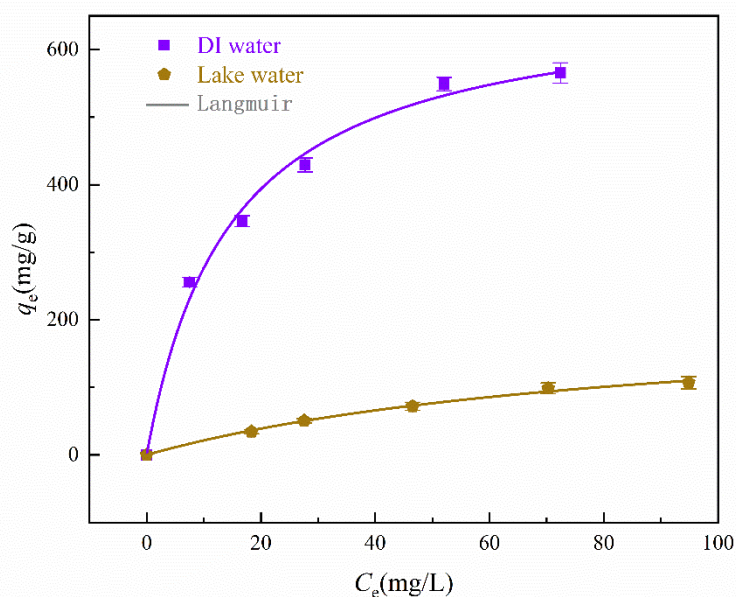

Figure S9. Effect of properties of the water matrices on adsorption of SMX by 2K-700.

Table S1 Pseudo-first-order and Pseudo-second-order models for SMX adsorption on 2K-700

| Solution concentration (mg/L) | Exp. $q_e$ (mg/g) | Pseudo-first-order model |                                     |       | Pseudo-second-order model |                                                         |       |                  |
|-------------------------------|-------------------|--------------------------|-------------------------------------|-------|---------------------------|---------------------------------------------------------|-------|------------------|
|                               |                   | Cal. $q_e$ (mg/g)        | $k_1$ ( $10^{-1} \text{min}^{-1}$ ) | $R^2$ | Cal. $q_e$ (mg/g)         | $k_2$ ( $10^{-3} \text{g}/(\text{mg}\cdot\text{min})$ ) | $R^2$ | $h$ (mg/(g·min)) |
| 20                            | 281.7             | 270.9                    | 2.668                               | 0.786 | 285.0                     | 1.500                                                   | 0.930 | 121.88           |
| 50                            | 439.3             | 423.1                    | 2.927                               | 0.778 | 442.2                     | 1.130                                                   | 0.922 | 221.00           |
| 100                           | 594.3             | 577.3                    | 3.283                               | 0.862 | 603.8                     | 0.901                                                   | 0.971 | 328.29           |

Table S2 the Intra-particle diffusion constants for SMX adsorption on 2K-700

| Solution concentration (mg/L) | Intra-particle-diffusion model                           |              |         |                                                          |              |         |
|-------------------------------|----------------------------------------------------------|--------------|---------|----------------------------------------------------------|--------------|---------|
|                               | $k_1$ ( $\text{mg}\cdot\text{g}^{-1}\text{min}^{-0.5}$ ) | $C_1$ (mg/g) | $R_1^2$ | $k_2$ ( $\text{mg}\cdot\text{g}^{-1}\text{min}^{-0.5}$ ) | $C_2$ (mg/g) | $R_2^2$ |
| 20                            | 29.827                                                   | 105.3        | 0.961   | 3.386                                                    | 247.6        | 0.578   |
| 50                            | 50.708                                                   | 164.6        | 0.977   | 0.651                                                    | 433.3        | 0.210   |
| 100                           | 68.585                                                   | 234.5        | 0.917   | 1.316                                                    | 584.7        | 0.878   |

Table S3 Properties of the water matrices employed in this work <sup>a</sup>

|            | pH   | TOC (mg/L) | UV254 (AU/cm) | Conductivity(mS/cm) |
|------------|------|------------|---------------|---------------------|
| Lake water | 8.60 | 8.25       | 0.1716        | 2.32                |

<sup>a</sup> Data reported in a just accepted work of the authors' research group (Chem. Eng. J, 2020, DOI: 10.1016/j.cej.2019.124009)

Table S4 The fitting parameters of Langmuir isotherm models

| Sample     | $q_{\max}(\text{mg}\cdot\text{g}^{-1})$ | $K_L(\text{L}\cdot\text{mg}^{-1})$ | $R^2$ |
|------------|-----------------------------------------|------------------------------------|-------|
| DI         | 681.24                                  | $6.84\times 10^{-2}$               | 0.992 |
| Lake water | 213.58                                  | $1.11\times 10^{-2}$               | 0.995 |

Table S5 SMX adsorption capacity in comparison to previous reports

| Adsorbents                                                               | $S_{\text{BET}}(\text{m}^2/\text{g})$ | $q_{\max}(\text{mg}/\text{g})$ | References |
|--------------------------------------------------------------------------|---------------------------------------|--------------------------------|------------|
| MOF-5-derived carbon calcined at 1000 °C                                 | 1731                                  | 625                            | [1]        |
| Sulfonic acid functionalized biochar                                     | -                                     | 425                            | [2]        |
| Sulfonated coffee waste                                                  | -                                     | 406                            | [3]        |
| Single-layer graphene oxide                                              | >2000                                 | 240                            | [4]        |
| ZIF-8-derived carbon calcined at 1000 °C                                 | 1855                                  | 435                            | [5]        |
| Fe <sub>2</sub> O <sub>3</sub> /CeO <sub>2</sub> loaded activated carbon | 1536                                  | 60                             | [6]        |
| Wood-based activated carbon                                              | 1541                                  | 329                            | [7]        |
| Activated carbon with a membrane bioreactor                              | >1000                                 | 282                            | [8]        |
| Organo-Vermiculites                                                      | 7.6                                   | 74                             | [9]        |
| Organo-montmorillonites                                                  | 23.9                                  | 243                            | [10]       |
| MIL-101(Cr)@GO                                                           | 3352                                  | 101                            | [11]       |
| MIL-101(Cr)                                                              | 2338                                  | 182                            | [12]       |
| Ag-FMWCNTs                                                               | -                                     | 119                            | [13]       |
| Peanut shells                                                            | 2                                     | 27                             | [14]       |
| 2K-700                                                                   | 1728                                  | 681                            | This work  |
| 2K-800                                                                   | 2703                                  | 907                            | This work  |

## References

- [1] X. Li, H. Yuan, X. Quan, S. Chen and S. You, *J. Environ. Sci. (China)*, 2018, 63, 250-259.
- [2] M. A. Ahsan, M. T. Islam, C. Hernandez, H. Kim, Y. Lin, M. L. Curry, J. Gardea-Torresdey and J. C. Noveron, *J. Environ. Chem. Eng.*, 2018, 6, 4215-4225.
- [3] M. A. Ahsan, M. T. Islam, M. A. Imam, A. H. M. G. Hyder, V. Jabbari, N. Dominguez and J. C. Noveron, *J. Environ. Chem. Eng.*, 2018, 6, 6602-6611.
- [4] H. Chen, B. Gao and H. Li, *J. Hazard. Mater.*, 2015, 282, 201-207.
- [5] I. Ahmed, B. N. Bhadra, H. J. Lee and S. H. Jung, *Cataly. Today*, 2018, 301, 90-97.
- [6] J. Akhtar, N. S. Amin and A. Aris, *Chem. Eng. J.*, 2011, 170, 136-144.
- [7] C. B. Vidal, M. Seredych, E. Rodriguez-Castellon, R. F. Nascimento and T. J. Badosz, *J. Colloid. Inter. Sci.*, 2015, 449, 180-191.
- [8] X. Li, F. I. Hai and L. D. Nghiem, *Bioresource. Technol.*, 2011, 102, 5319-5324.
- [9] S. Guo, M. Gao, T. Shen, Y. Xiang and G. Cao, *Micropor. Mesoporous Mat.*, 2019, 286, 36-44.
- [10] L. Lu, M. Gao, Z. Gu, S. Yang and Y. Liu, *J. Environ. Sci.*, 2014, 26, 2535-2545.
- [11] X. Jia, S. Li, Y. Wang, T. Wang and X. Hou, *J. Chem. Eng. Data*, 2019, 64, 1265-1274.
- [12] X. Huang, Q. Hu, L. Gao, Q. Hao, P. Wang and D. Qin, *RSC Adv.*, 2018, 8, 27623-27630.
- [13] Q. Song, H. Wang, B. Yang, F. Wang and X. Sun, *RSC Adv.*, 2016, 6, 75855-75861.
- [14] R. Li, Y. Zhang, W. Chu, Z. Chen and J. Wang, *RSC Adv.*, 2018, 8, 13546-13555.
